# Supplementary figures and images for: Freezing out all-optical poling dynamics of azophenylcarbazole molecules in polycarbonate
Source: Royal Society of Chemistry journal article supplement (doi:10.1039/c3cp51918j), 2013-01-01

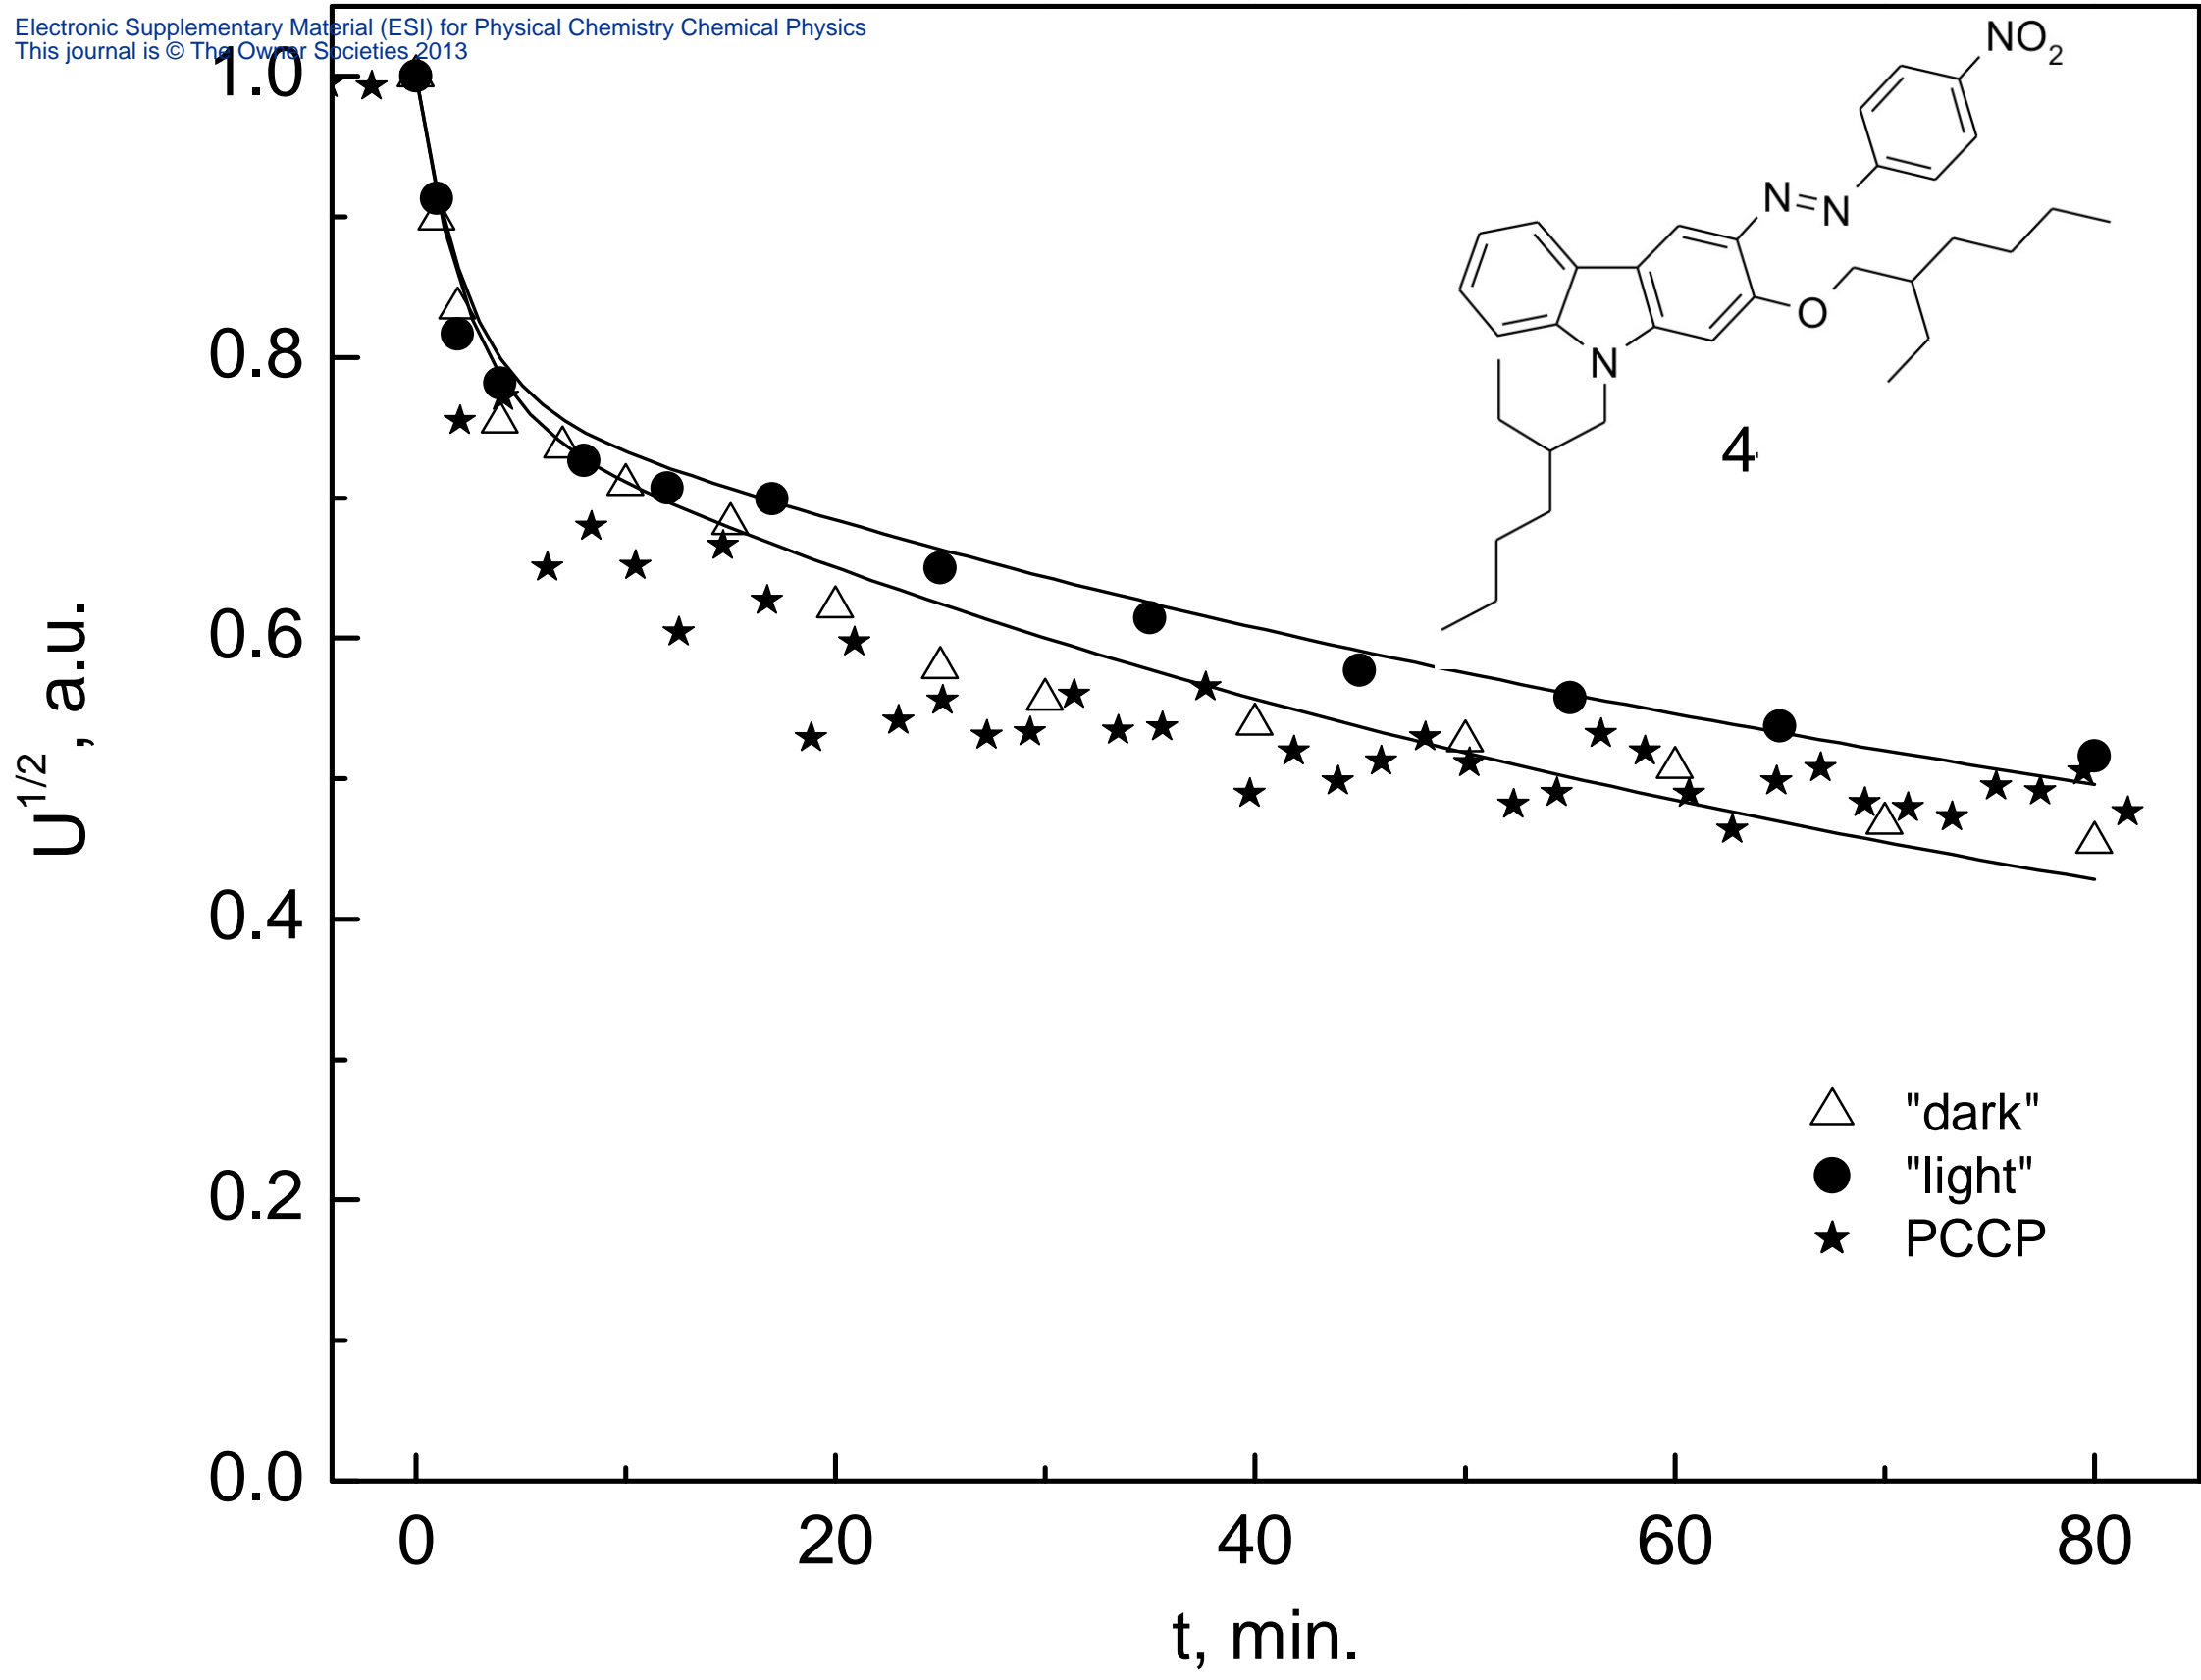

Supplement: c3cp51918j_2.pdf [file c3cp51918j_2.pdf]
